# Supplementary material for: Zwitterionic polydopamine coatings suppress silicone implant-induced capsule formation
Source: Royal Society of Chemistry journal article supplement (doi:10.1039/d0bm02215b), 2021-01-01
Supplement: d0bm02215b1.pdf [file d0bm02215b1.pdf]

## Supplementary Information

### Zwitterionic Polydopamine Coatings Suppress Silicone Implant-Induced Capsule Formation

Chung Min Shin,<sup>a,‡</sup> Soojeong Cho,<sup>b,‡</sup> Dong Ho Kim,<sup>c,d,‡</sup> Yooseok Ha,<sup>a</sup> Hyo Jung Shin,<sup>c,e</sup> Nara Shin,<sup>c,e</sup> Dong Woon Kim,<sup>c,e</sup> Chul Hee Choi,<sup>c,d</sup> Woo Kyung Cho<sup>b,\*</sup> and Sang-Ha Oh<sup>a,\*</sup>

<sup>a</sup>Department of Plastic and Reconstructive Surgery, Chungnam National University College of Medicine, Daejeon 35015, Republic of Korea

<sup>b</sup>Department of Chemistry, Chungnam National University, Daejeon 34134, Republic of Korea

<sup>c</sup>Department of Medical Science, Chungnam National University College of Medicine, Daejeon, 35015, Republic of Korea

<sup>d</sup>Department of Microbiology, Chungnam National University College of Medicine, Daejeon, 35015, Republic of Korea

<sup>e</sup>Department of Anatomy and Cell Biology, Brain Research Institute, Chungnam National University College of Medicine, Daejeon, 35015, Republic of Korea  
Chemistry, Chungnam National University, Daejeon 34134, Korea

\*Corresponding Authors

E-mail: djplastic@cnu.ac.kr; wkcho@cnu.ac.kr

<sup>‡</sup>These authors equally contributed to this work.

## **CONTENTS**

- **Figure S1.** (A) Changes in color of the prepared coating solutions with various concentrations and (B) Photographs of Si/SiO<sub>2</sub> substrates before and after *ZW*-DOPA coatings with various concentrations. The scale bar indicates 0.4 cm.
- **Figure S2.** (A) Coating thickness on Si/SiO<sub>2</sub> substrates with respect to various concentrations of *ZW*-DOPA and (B) static water contact angles on the substrates before and after *ZW*-DOPA coatings.
- **Figure S3.** Photographs of the silicone implants before and after *ZW*-DOPA (0.5 mg/mL) coating. The scale on a ruler is in mm.

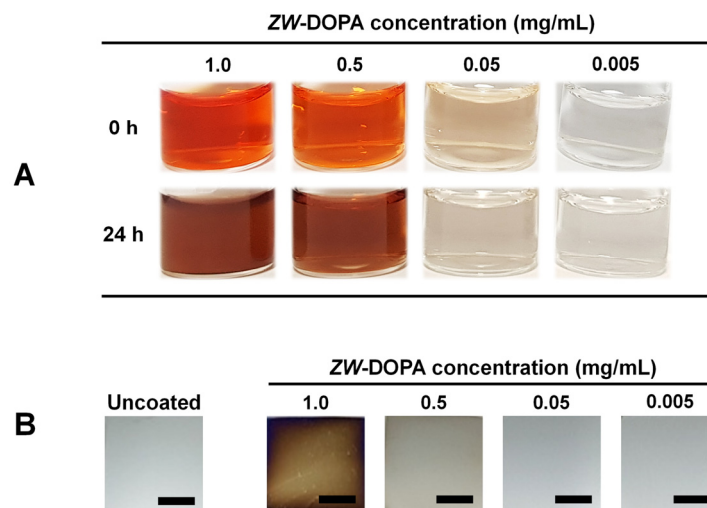

**Figure S1.** (A) Changes in color of the prepared coating solutions with various concentrations and (B) Photographs of Si/SiO<sub>2</sub> substrates before and after ZW-DOPA coatings with various concentrations. The scale bar indicates 0.4 cm.

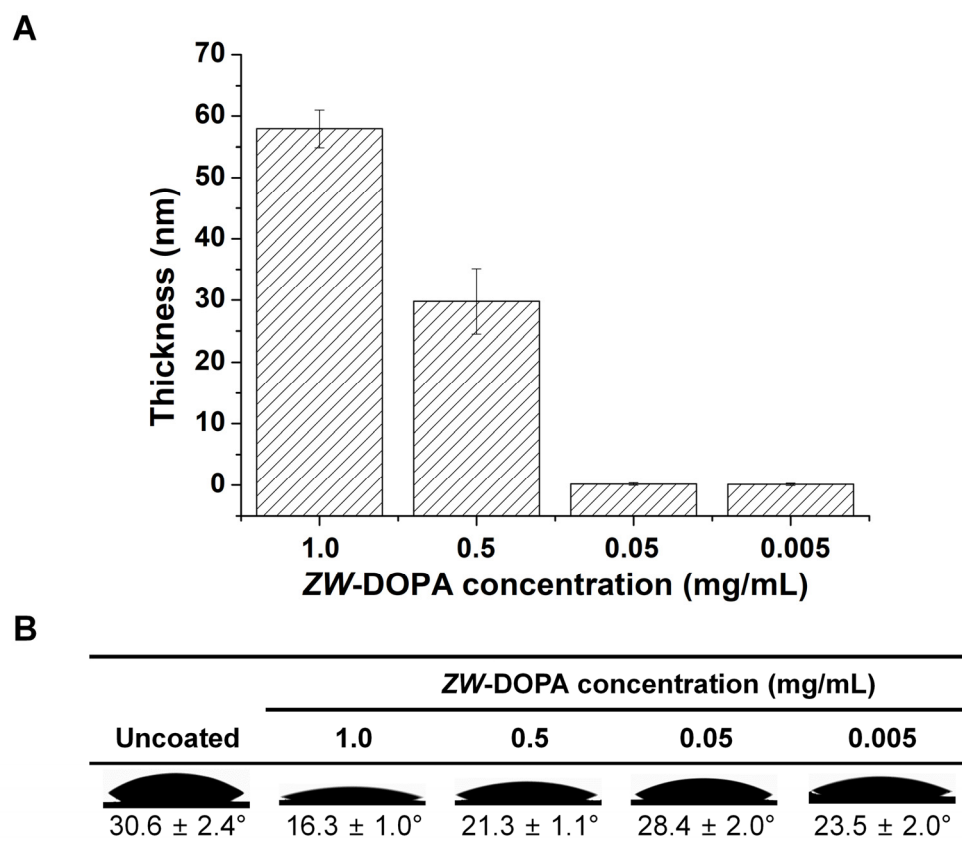

**Figure S2.** (A) Coating thickness on Si/SiO<sub>2</sub> substrates with respect to various concentrations of ZW-DOPA and (B) static water contact angles on the substrates before and after ZW-DOPA coatings.

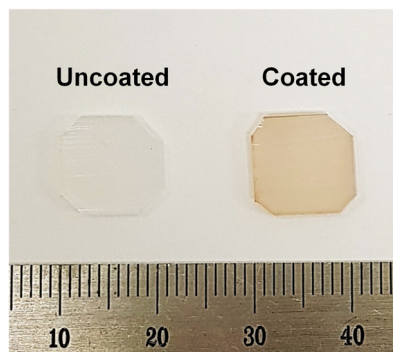

**Figure S3.** Photographs of the silicone implants before and after *ZW*-DOPA (0.5 mg/mL) coating. The scale on a ruler is in mm.
